# Supplementary material
Source: PubMed Central journal article supplement (PMC5669360)
Supplement: NIHMS893961-supplement-2.pdf [file NIHMS893961-supplement-2.pdf]

a.

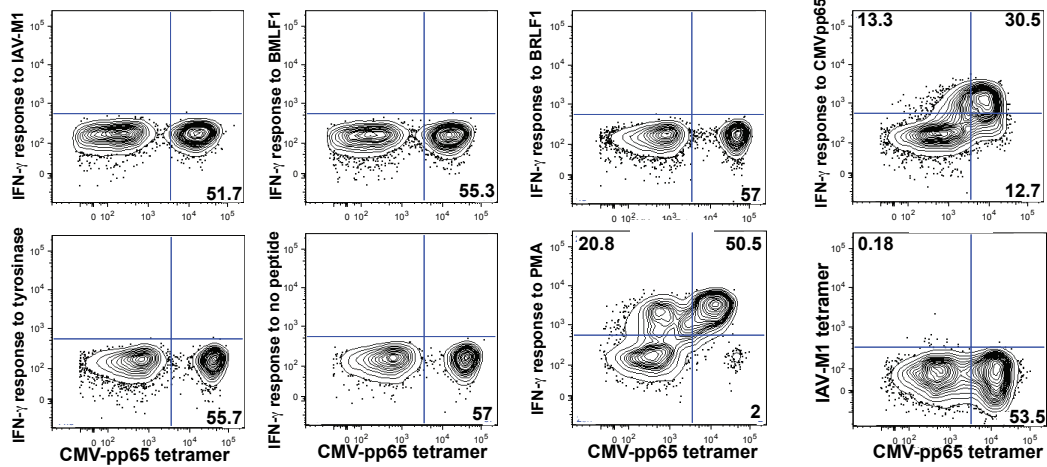

b.

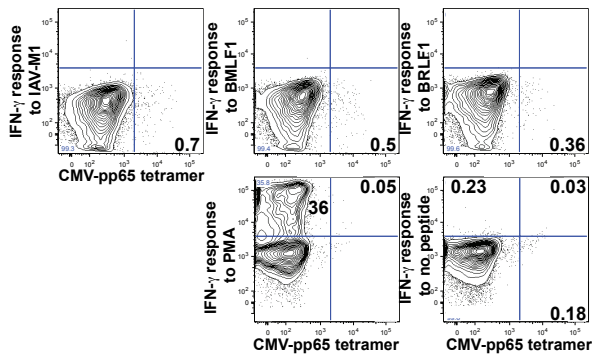

**Figure S2. No functional IAV-M1 and EBV lytic antigen IFN- $\gamma$  responses in CMV-pp65-stimulated short term cultures in MA-EBV-SN donors:** CD8 T-cells from CMV-pp65-stimulated cultures were subjected to an ICS assay measuring IFN- $\gamma$  production upon stimulation with indicated peptides for 5 hours at 37 degrees and co-staining with CMV-pp65 tetramer (gated on live CD3+CD8+ cells). **a.)** Representative results from CMV seropositive MA-EBV-SN Donor 4 demonstrate that these cultures do not contain IAV-M1, BMLF1 or BRLF1 responding cells. **b.)** Representative results from CMV seronegative MA-EBV-SN Donor 1 demonstrate that these cultures do not contain any IAV-M1, BMLF1 or BRLF1 responding cells.
