# Supplementary material
Source: PubMed Central journal article supplement (PMC5669360)
Supplement: NIHMS893961-supplement-4.pdf [file NIHMS893961-supplement-4.pdf]

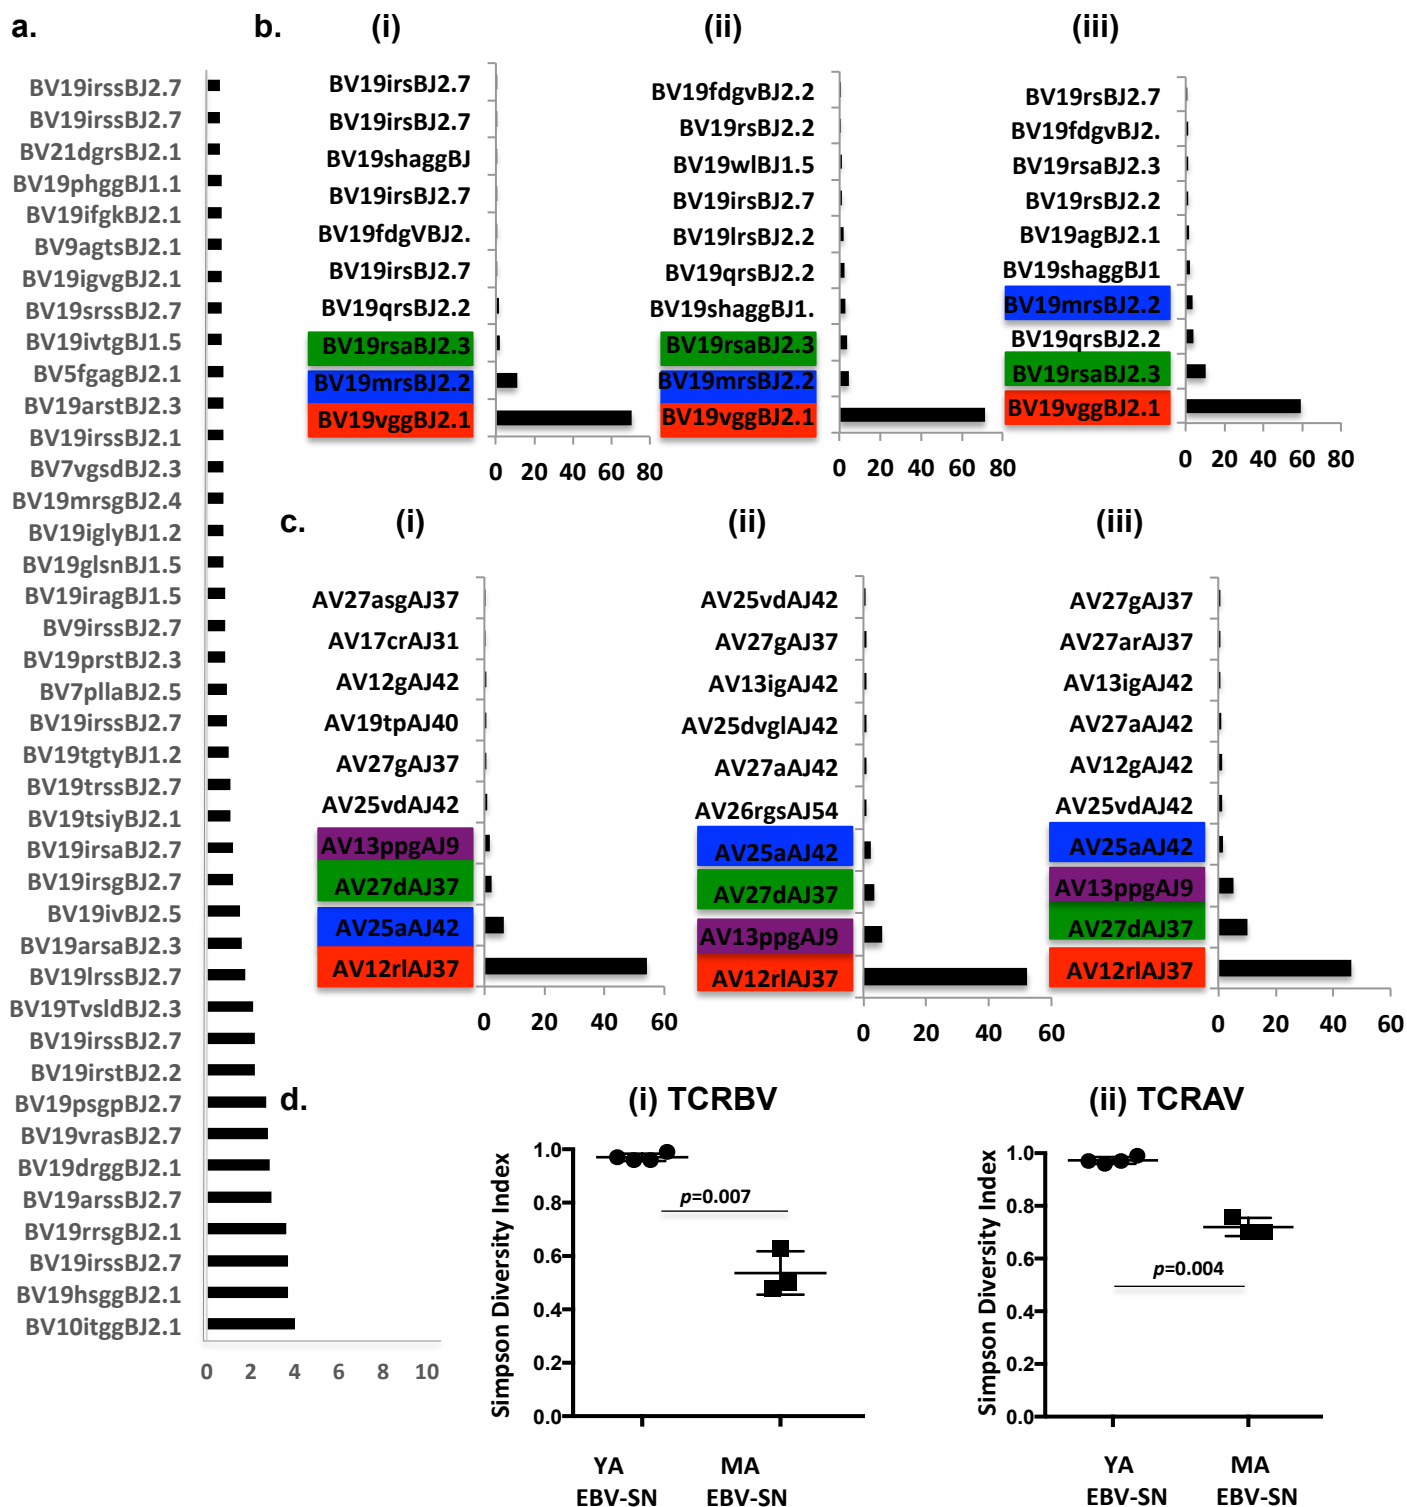

Figure S4: MA-EBV-SN display an uncommon oligoclonal IAV-M1 TCR repertoire versus YA-EBV-SN donors: **a)** TCR deep sequencing of sorted IAV-M1 tetramer+ cells shows typical clonal distribution of a representative IAV-M1-restricted Vb19 TCR repertoire in YA-EBV-SN donor (ES215) showing expected polyclonality with increased usage of the signature xRSx CDR3 motif and Jb2.7 with no dominating clonotypes. Representative VB (**b**) and VA (**c**) clonal distribution of sorted IAV-M1-restricted repertoire with Vb19 and Va12 dominating the TCR repertoire in MA-EBV-SN (Donor 1) showing a highly oligoclonal response. The same clone dominates in all 3 short-term-cultures. The color of each clonotype indicates whether a specific clonotype is present in different cultures. **d)** Significantly decreased diversity of the IAV-M1 Va and b TCR repertoire in MA-EBV-SN versus YA-EBV-SN (Simpson Diversity Index, Student's t test). IAV-M1-tetramer+ cells were sorted from indicated short-term-cultures, and subjected to deep sequencing of the CDR3a/b to identify individual clonotypes.
